# Supplementary material for: The Bicarbonate Transporter Is Essential for Bacillus anthracis Lethality
Source: PubMed Central journal article supplement (PMC2582132; doi:10.1371/journal.ppat.1000210), 2008-11-21
Supplement: ppat.1000210.s001.pdf [file ppat.1000210.s001.pdf]

**Table S1.** Oligonucleotide primers used in this study

---

|               |                                    |
|---------------|------------------------------------|
| BAS2714U5'Bam | CACCGGATCCTTGATGGAAACAATATTTCGAATG |
| BAS2714U3'Sal | TGCGTCGACTTGACTGTTGTGTAATCGAAAGC   |
| BAS2712D5'Sal | CACCGTCGACTGGCGAGATGGTTTTAAAGG     |
| BAS2712D3'Pst | TGCCTGCAGTCCCATGCCTCTTCTTCTGT      |
| BAS2714Seq    | ATGAACGGTCTGTCATGCAA               |
| BAS27145'Xba  | CACCTCTAGATGAAATGGGTATGCGTATTTGT   |
| BAS27123'Hind | TGCAAGCTTTTTGCACACCCCTTTATT        |
| BAS2714Seq1   | GCGATAAGAAATAGCTTTTCGATT           |
| BAS2714Seq2   | AACATTGCAGCTGATTTGTCA              |
| BAS2714Seq3   | AGGGAAAGGGTGAGTATTTATGT            |
| BAS2714Seq4   | CGAGCGCTTGATAAAGAAGG               |
| BAS2714Seq5   | AAGCGTTAAAGGCGAATTGA               |
| BAS2714Seq6   | ATTAATTGCGGACGGTGCAT               |
| BAS4675U5'Bam | CACCGGATCCTCTCGAGCCACATATGAATCC    |
| BAS4675U3'Sal | TGCGTCGACTGCAAGCAGCAAATGTAAAAA     |
| BAS4677D5'Sal | CACCGTCGACTGTGTTTGTTGAGGCATTTGA    |
| BAS4677D5'Pst | TGCCTGCAGGAACGACAAATGTAGCGGAAG     |
| BAS4675Seq    | CTTCGTCTCGCATCAACAAA               |
| AtxA5'promEco | TATAAGAATTCTATGTTAATATGCT          |
| AtxA3'Bam     | CAAATGGATCCAGGGCATTATATTATC        |

---

**Table S2.** Activity of carbonic anhydrase inhibitors in *B. anthracis*.

| Compound <sup>a</sup> | 50% inhibitory concentration <sup>b</sup> | >90% inhibitory concentration <sup>b</sup> |
|-----------------------|-------------------------------------------|--------------------------------------------|
| Acetazolamide         | 180µM                                     | N/S <sup>c</sup>                           |
| Ethoxzolamide         | 350µM                                     | N/S <sup>c</sup>                           |
| Hydrochlorothiazide   | 550µM                                     | 900µM                                      |
| Topiramate            | N/A <sup>d</sup>                          | N/A <sup>d</sup>                           |

a) Sigma-Aldrich

b) Inhibition of *pagA-lacZ* expression relative to control. Cells were grown in R-media without added NaHCO<sub>3</sub> in the presence of 5%CO<sub>2</sub>

c) Compounds not soluble at concentrations required to reach the indicated level of inhibition

d) No inhibition observed at highest concentrations tested
